# Supplementary material
Source: HighWire-hosted journal article supplement (https://cmajopen.ca/highwire/filestream/85470/field_highwire_adjunct_files/1/2020-0099-2-at.pdf)
Supplement: 2020-0099-2-at.pdf [file 2020-0099-2-at.pdf]

### A.

| Study or Subgroup                    | Home SBP     |            |            | Office SBP   |            |            | Weight        | Mean Difference<br>IV, Random, 95% CI [mm Hg] | Year | Mean Difference<br>IV, Random, 95% CI [mm Hg] |
|--------------------------------------|--------------|------------|------------|--------------|------------|------------|---------------|-----------------------------------------------|------|-----------------------------------------------|
|                                      | Mean [mm Hg] | SD [mm Hg] | Total      | Mean [mm Hg] | SD [mm Hg] | Total      |               |                                               |      |                                               |
| Lo 2002                              | 111          | 11         | 79         | 113          | 19         | 79         | 12.1%         | -2.00 [-6.84, 2.84]                           | 2002 |                                               |
| Tucker 2017                          | 125          | 13         | 166        | 126          | 16         | 166        | 15.9%         | -1.00 [-4.14, 2.14]                           | 2017 |                                               |
| Kalafat 2018                         | 134.05       | 3.23       | 60         | 138.8        | 2.96       | 60         | 20.0%         | -4.75 [-5.86, -3.64]                          | 2018 |                                               |
| Vestgaard 2019a                      | 107          | 8          | 103        | 118          | 11         | 103        | 17.1%         | -11.00 [-13.63, -8.37]                        | 2019 |                                               |
| Vestgaard Chronic Hypertension 2019b | 126          | 11         | 32         | 128          | 14         | 32         | 9.6%          | -2.00 [-8.17, 4.17]                           | 2019 |                                               |
| Vestgaard Normotensive 2019b         | 118          | 10         | 163        | 122          | 13         | 163        | 17.4%         | -4.00 [-6.52, -1.48]                          | 2019 |                                               |
| Vestgaard WCH 2019b                  | 123          | 9          | 27         | 124          | 17         | 27         | 7.9%          | -1.00 [-8.26, 6.26]                           | 2019 |                                               |
| <b>Total (95% CI)</b>                |              |            | <b>630</b> |              |            | <b>630</b> | <b>100.0%</b> | <b>-4.20 [-6.80, -1.60]</b>                   |      |                                               |

Heterogeneity: Tau<sup>2</sup> = 8.48; Chi<sup>2</sup> = 30.55, df = 6 (P < 0.0001); I<sup>2</sup> = 80%  
 Test for overall effect: Z = 3.17 (P = 0.002)

### B.

| Study or Subgroup                    | Home DBP     |            |            | Office DBP   |            |            | Weight        | Mean Difference<br>IV, Random, 95% CI [mm Hg] | Year | Mean Difference<br>IV, Random, 95% CI [mm Hg] |
|--------------------------------------|--------------|------------|------------|--------------|------------|------------|---------------|-----------------------------------------------|------|-----------------------------------------------|
|                                      | Mean [mm Hg] | SD [mm Hg] | Total      | Mean [mm Hg] | SD [mm Hg] | Total      |               |                                               |      |                                               |
| Lo 2002                              | 65           | 7          | 79         | 71           | 8          | 79         | 14.5%         | -6.00 [-8.34, -3.66]                          | 2002 |                                               |
| Tucker 2017                          | 79           | 9          | 166        | 80           | 10         | 166        | 15.1%         | -1.00 [-3.05, 1.05]                           | 2017 |                                               |
| Kalafat 2018                         | 86.19        | 2.35       | 60         | 88.5         | 3.45       | 60         | 16.8%         | -2.31 [-3.37, -1.25]                          | 2018 |                                               |
| Vestgaard 2019a                      | 66           | 6          | 103        | 75           | 8          | 103        | 15.3%         | -9.00 [-10.93, -7.07]                         | 2019 |                                               |
| Vestgaard Chronic Hypertension 2019b | 77           | 7          | 32         | 83           | 8          | 32         | 11.6%         | -6.00 [-9.68, -2.32]                          | 2019 |                                               |
| Vestgaard Normotensive 2019b         | 76           | 7          | 163        | 79           | 8          | 163        | 15.9%         | -3.00 [-4.63, -1.37]                          | 2019 |                                               |
| Vestgaard WCH 2019b                  | 78           | 6          | 27         | 82           | 9          | 27         | 10.8%         | -4.00 [-8.08, 0.08]                           | 2019 |                                               |
| <b>Total (95% CI)</b>                |              |            | <b>630</b> |              |            | <b>630</b> | <b>100.0%</b> | <b>-4.39 [-6.56, -2.22]</b>                   |      |                                               |

Heterogeneity: Tau<sup>2</sup> = 7.03; Chi<sup>2</sup> = 48.17, df = 6 (P < 0.00001); I<sup>2</sup> = 88%  
 Test for overall effect: Z = 3.97 (P < 0.0001)

Forest plot of comparison: Differences in mean (A) systolic blood pressure (SBP) and (B) diastolic blood pressure (DBP) between home and office blood pressure measurements in pregnancy in studies using validated home blood pressure monitors. Mean difference is calculated by home BP subtract office BP.

### References:

1. Lo C, Taylor RS, Gamble G, McCowan L, North RA. Use of automated home blood pressure monitoring in pregnancy: is it safe? *Am J Obstet Gynecol.* 2002;187(5):1321-8.
2. Tucker KL, Taylor KS, Crawford C, Hodgkinson JA, Bankhead C, Carver T, et al. Blood pressure self-monitoring in pregnancy: examining feasibility in a prospective cohort study. *BMC Pregnancy & Childbirth.* 2017;17(1):442.
3. Kalafat E, Mir I, Perry H, Thilaganathan B, Khalil A. Is Home Blood Pressure Monitoring in Hypertensive Disorders of Pregnancy Consistent with Clinic Recordings? *Ultrasound Obstet Gynecol.* 2018.
4. Vestgaard M, Carstens Soholm J, Kjaerhus Norgaard S, Asbjornsdottir B, Ringholm L, Damm P, et al. Home blood pressure in pregnancy-the upper reference limit. *Blood Press Monit.* 2019a;24(4):191-8.
5. Vestgaard M, Asbjornsdottir B, Ringholm L, Andersen LLT, Jensen DM, Damm P, et al. White coat hypertension in early pregnancy in women with pre-existing diabetes: prevalence and pregnancy outcomes. *Diabetologia.* 2019b;62(12):2188-99.
